# Supplementary material for: A series of neutral radical CpNi(dithiolene)˙ complexes
Source: Royal Society of Chemistry journal article supplement (doi:10.1039/b418756n), 2005-01-01
Supplement: b418756n.pdf [file b418756n.pdf]

## Supplementary Material

### A Series of Neutral Radicalar CpNi(dithiolene)<sup>•</sup> Complexes.

Marc Fourmigué\* and Narcis Avarvari

**Table S1.** Geometry optimized coordinates of CpNi(dmit)<sup>•</sup> derived by DFT calculations.

|    |           |           |           |
|----|-----------|-----------|-----------|
| Ni | -0.052031 | -0.079674 | 0.005323  |
| S  | -0.033966 | -0.079548 | 2.167573  |
| S  | 2.103388  | -0.114412 | -0.192131 |
| S  | 2.318595  | -0.123925 | 4.133599  |
| S  | 4.291274  | -0.155831 | 1.954639  |
| S  | 5.252942  | -0.176784 | 4.808184  |
| C  | 1.677310  | -0.110431 | 2.491491  |
| C  | 2.594130  | -0.125320 | 1.478907  |
| C  | 4.033643  | -0.153616 | 3.704211  |
| C  | -2.105625 | -0.012147 | -0.248844 |
| H  | -2.810077 | 0.034950  | 0.571663  |
| C  | -1.541278 | 1.113784  | -0.928156 |
| H  | -1.723031 | 2.153883  | -0.695083 |
| C  | -0.628303 | 0.612001  | -1.879494 |
| H  | 0.010227  | 1.198763  | -2.526454 |
| C  | -0.681867 | -0.832596 | -1.842356 |
| H  | -0.088125 | -1.497629 | -2.455180 |
| C  | -1.621341 | -1.213219 | -0.863382 |
| H  | -1.875967 | -2.222849 | -0.571810 |

**Table S2.** Selected Eigenvalues of orbitals of CpNi(dmit)<sup>•</sup>, calculated using the geometry optimized coordinates.

| Label    | Occupancy | Eigenvalue (Hartee) | Eigenvalue (eV) |
|----------|-----------|---------------------|-----------------|
| $\alpha$ | 1         | -0.28594            | -7.7808         |
| $\beta$  | 1         | -0.28320            | -7.7062         |
| $\alpha$ | 1         | -0.27679            | -7.5318         |
| $\beta$  | 1         | -0.26040            | -7.0858         |
| $\alpha$ | 1         | -0.25625            | -6.9729         |
| $\beta$  | 1         | -0.24392            | -6.6374         |
| $\alpha$ | 1         | -0.23872            | -6.4959         |
| $\beta$  | 1         | -0.22578            | -6.1438         |
| $\alpha$ | 1         | -0.22611            | -6.1527         |
| $\beta$  | 1         | -0.20655            | -5.6205         |
| $\alpha$ | 1         | -0.19474            | -5.2991         |
| $\beta$  | 0         | -0.12678            | -3.4498         |
| $\alpha$ | 0         | -0.11884            | -3.2338         |
| $\beta$  | 0         | -0.10419            | -2.8351         |
| $\alpha$ | 0         | -0.06555            | -1.7837         |
| $\beta$  | 0         | -0.06387            | -1.7380         |
| $\alpha$ | 0         | -0.02323            | -0.63212        |
| $\beta$  | 0         | -0.02290            | -0.62314        |
| $\alpha$ | 0         | -0.00800            | -0.21769        |
| $\beta$  | 0         | -0.00166            | -0.04517        |
